# Supplementary material for: Geothermal as resource for megacities
Source: Research Square preprint supplement (doi:10.21203/rs.3.rs-138874/v1), 2021-01-13
Supplement: Supplementary file 1 [file bbbaa8e83edd5b91dc4656b1.xlsx]

## Sheet: Sheet1
Energy parameters in megacities	Average	[%] Standard deviation
Inhabitants	15.183.543	38,33
Heating degree days 1	1.136	98,81
Cooling degree days 2	546	85,33
Total energy demand [GWh]	240.577	81,32
Electricity	56.837	91,43
Heat (incl. industry)	119.93	82,05
Transport	63.809	102,79
Water consumption [Mm³]	2.607	101,44
Solid waste [kt]	5.637	107,27
